# Supplementary material for: Phenotypic deficits in the HIV-1 envelope are associated with the maturation of a V2-directed broadly neutralizing antibody lineage
Source: PLOS journal article supplement (doi:10.1371/journal.ppat.1006825), 2018-01-25

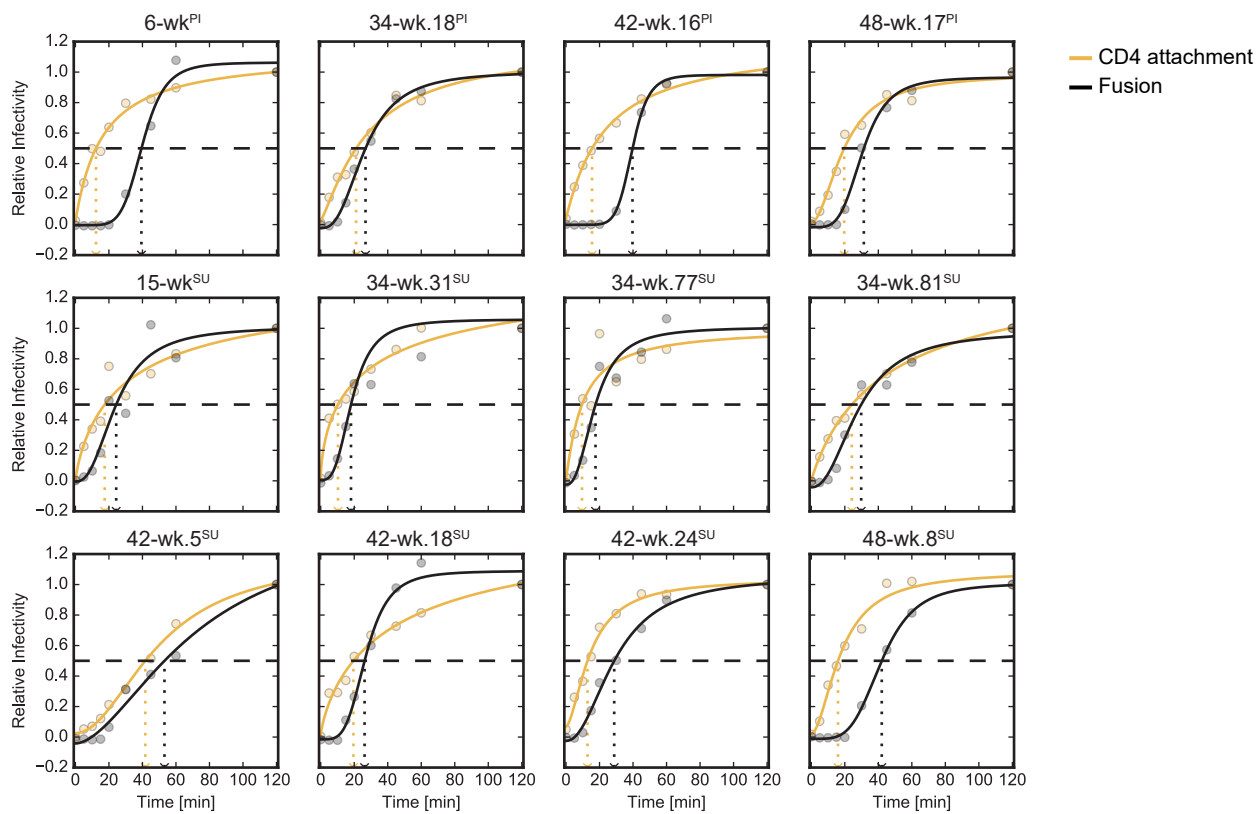

Supplement: S4 (10.1371/journal.ppat.1006825.s004) [file journal.ppat.1006825.s004]
